# Supplementary material
Source: PubMed Central journal article supplement (PMC4059784)
Supplement: NIHMS578934-supplement-supplement_1.pdf [file NIHMS578934-supplement-supplement_1.pdf]

Supplemental Table 1. Pearson correlation coefficients between air toxics, among controls only

|                        | Ortho-xylene | Toluene | Ethyl Benzene | 1,3-Butadiene | Benzene | Styrene | Perchloroethylene | Lead | Meta/para-xylene | Total PAHs | Benzo(b)fluoranthene | Benzo(k)fluoranthene | Indeno(1,2,3-cd)pyrene | Benzo(a)pyrene | Dibenz(a,h)anthracene | Benzo(g,h,i)perylene | Carbon Tetrachloride | Trichloroethylene | Ortho-Dichlorobenzene | Chloroform | Para-Dichlorobenzene | Formaldehyde | Selenium | Chromium | Hexavalent chromium | Acetaldehyde | Nickel |  |  |
|------------------------|--------------|---------|---------------|---------------|---------|---------|-------------------|------|------------------|------------|----------------------|----------------------|------------------------|----------------|-----------------------|----------------------|----------------------|-------------------|-----------------------|------------|----------------------|--------------|----------|----------|---------------------|--------------|--------|--|--|
| Ortho-xylene           | 1.00         |         |               |               |         |         |                   |      |                  |            |                      |                      |                        |                |                       |                      |                      |                   |                       |            |                      |              |          |          |                     |              |        |  |  |
| Toluene                | 0.96         | 1.00    |               |               |         |         |                   |      |                  |            |                      |                      |                        |                |                       |                      |                      |                   |                       |            |                      |              |          |          |                     |              |        |  |  |
| Ethyl Benzene          | 0.93         | 0.90    | 1.00          |               |         |         |                   |      |                  |            |                      |                      |                        |                |                       |                      |                      |                   |                       |            |                      |              |          |          |                     |              |        |  |  |
| 1,3-Butadiene          | 0.90         | 0.89    | 0.91          | 1.00          |         |         |                   |      |                  |            |                      |                      |                        |                |                       |                      |                      |                   |                       |            |                      |              |          |          |                     |              |        |  |  |
| Benzene                | 0.95         | 0.94    | 0.91          | 0.91          | 1.00    |         |                   |      |                  |            |                      |                      |                        |                |                       |                      |                      |                   |                       |            |                      |              |          |          |                     |              |        |  |  |
| Styrene                | 0.82         | 0.79    | 0.73          | 0.67          | 0.80    | 1.00    |                   |      |                  |            |                      |                      |                        |                |                       |                      |                      |                   |                       |            |                      |              |          |          |                     |              |        |  |  |
| Perchloroethylene      | 0.83         | 0.85    | 0.81          | 0.81          | 0.81    | 0.62    | 1.00              |      |                  |            |                      |                      |                        |                |                       |                      |                      |                   |                       |            |                      |              |          |          |                     |              |        |  |  |
| Lead                   | 0.81         | 0.82    | 0.76          | 0.72          | 0.84    | 0.73    | 0.75              | 1.00 |                  |            |                      |                      |                        |                |                       |                      |                      |                   |                       |            |                      |              |          |          |                     |              |        |  |  |
| Meta/para-xylene       | 0.96         | 0.91    | 0.79          | 0.85          | 0.85    | 0.39    | 0.84              | 0.71 | 1.00             |            |                      |                      |                        |                |                       |                      |                      |                   |                       |            |                      |              |          |          |                     |              |        |  |  |
| Total PAHs             | 0.50         | 0.47    | 0.49          | 0.55          | 0.56    | 0.46    | 0.30              | 0.28 | 0.35             | 1.00       |                      |                      |                        |                |                       |                      |                      |                   |                       |            |                      |              |          |          |                     |              |        |  |  |
| Benzo(b)fluoranthene   | 0.38         | 0.35    | 0.36          | 0.43          | 0.45    | 0.39    | 0.18              | 0.23 | 0.19             | 0.98       | 1.00                 |                      |                        |                |                       |                      |                      |                   |                       |            |                      |              |          |          |                     |              |        |  |  |
| Benzo(k)fluoranthene   | 0.34         | 0.30    | 0.31          | 0.38          | 0.39    | 0.35    | 0.14              | 0.18 | 0.13             | 0.97       | 0.99                 | 1.00                 |                        |                |                       |                      |                      |                   |                       |            |                      |              |          |          |                     |              |        |  |  |
| Indeno(1,2,3-cd)pyrene | 0.49         | 0.46    | 0.49          | 0.53          | 0.56    | 0.47    | 0.29              | 0.30 | 0.34             | 0.99       | 0.97                 | 0.96                 | 1.00                   |                |                       |                      |                      |                   |                       |            |                      |              |          |          |                     |              |        |  |  |
| Benzo(a)pyrene         | 0.25         | 0.22    | 0.23          | 0.30          | 0.32    | 0.28    | 0.04              | 0.09 | 0.08             | 0.95       | 0.97                 | 0.98                 | 0.94                   | 1.00           |                       |                      |                      |                   |                       |            |                      |              |          |          |                     |              |        |  |  |
| Dibenz(a,h)anthracene  | 0.17         | 0.14    | 0.11          | 0.18          | 0.27    | 0.28    | 0.03              | 0.21 | -0.04            | 0.75       | 0.77                 | 0.78                 | 0.79                   | 0.79           | 1.00                  |                      |                      |                   |                       |            |                      |              |          |          |                     |              |        |  |  |
| Benzo(g,h,i)perylene   | 0.73         | 0.71    | 0.71          | 0.79          | 0.78    | 0.61    | 0.55              | 0.46 | 0.60             | 0.92       | 0.83                 | 0.80                 | 0.89                   | 0.75           | 0.51                  | 1.00                 |                      |                   |                       |            |                      |              |          |          |                     |              |        |  |  |
| Carbon Tetrachloride   | 0.51         | 0.49    | 0.43          | 0.44          | 0.67    | 0.67    | 0.41              | 0.62 | -0.15            | 0.35       | 0.34                 | 0.28                 | 0.36                   | 0.26           | 0.27                  | 0.43                 | 1.00                 |                   |                       |            |                      |              |          |          |                     |              |        |  |  |
| Trichloroethylene      | 0.52         | 0.56    | 0.48          | 0.50          | 0.47    | 0.42    | 0.53              | 0.51 | 0.51             | 0.08       | 0.02                 | -0.02                | 0.08                   | -0.08          | -0.07                 | 0.24                 | 0.18                 | 1.00              |                       |            |                      |              |          |          |                     |              |        |  |  |
| Ortho-Dichlorobenzene  | 0.03         | 0.00    | -0.06         | -0.04         | -0.09   | -0.05   | 0.07              | 0.33 | 0.19             | -0.18      | -0.16                | -0.14                | -0.17                  | -0.18          | -0.02                 | -0.17                | -0.24                | 0.10              | 1.00                  |            |                      |              |          |          |                     |              |        |  |  |
| Chloroform             | 0.38         | 0.41    | 0.39          | 0.37          | 0.27    | 0.21    | 0.43              | 0.26 | 0.64             | -0.07      | -0.17                | -0.20                | -0.09                  | -0.22          | -0.22                 | 0.13                 | -0.17                | 0.25              | 0.37                  | 1.00       |                      |              |          |          |                     |              |        |  |  |
| Para-Dichlorobenzene   | 0.41         | 0.35    | 0.37          | 0.29          | 0.28    | 0.37    | 0.36              | 0.42 | 0.30             | -0.04      | -0.09                | -0.09                | -0.04                  | -0.17          | -0.06                 | 0.08                 | 0.07                 | 0.38              | 0.52                  | 0.40       | 1.00                 |              |          |          |                     |              |        |  |  |
| Formaldehyde           | 0.20         | 0.23    | 0.20          | 0.25          | 0.11    | -0.04   | 0.27              | 0.18 | 0.56             | 0.04       | -0.01                | -0.02                | 0.02                   | -0.04          | -0.05                 | 0.12                 | -0.40                | 0.14              | 0.41                  | 0.60       | 0.21                 | 1.00         |          |          |                     |              |        |  |  |
| Selenium               | 0.49         | 0.53    | 0.45          | 0.49          | 0.49    | 0.32    | 0.48              | 0.52 | 0.34             | 0.25       | 0.17                 | 0.14                 | 0.23                   | 0.06           | 0.02                  | 0.42                 | 0.04                 | 0.42              | 0.03                  | 0.16       | 0.19                 | 0.22         | 1.00     |          |                     |              |        |  |  |
| Chromium               | 0.51         | 0.55    | 0.52          | 0.52          | 0.50    | 0.57    | 0.49              | 0.47 | 0.41             | 0.23       | 0.14                 | 0.10                 | 0.21                   | 0.03           | 0.03                  | 0.46                 | 0.09                 | 0.27              | 0.29                  | 0.38       | 0.25                 | 0.39         | 0.49     | 1.00     |                     |              |        |  |  |
| Hexavalent chromium    | 0.62         | 0.59    | 0.56          | 0.55          | 0.67    | 0.51    | 0.42              | 0.45 | 0.43             | 0.24       | 0.13                 | 0.11                 | 0.23                   | 0.05           | 0.02                  | 0.41                 | 0.38                 | 0.10              | 0.22                  | 0.25       | 0.24                 | 0.06         | 0.20     | 0.36     | 1.00                |              |        |  |  |
| Acetaldehyde           | 0.76         | 0.74    | 0.64          | 0.69          | 0.74    | 0.70    | 0.71              | 0.70 | 0.44             | 0.50       | 0.45                 | 0.41                 | 0.48                   | 0.31           | 0.25                  | 0.63                 | 0.44                 | 0.40              | -0.02                 | 0.31       | 0.23                 | 0.37         | 0.58     | 0.48     | 0.34                | 1.00         |        |  |  |
| Nickel                 | 0.47         | 0.50    | 0.42          | 0.48          | 0.51    | 0.60    | 0.46              | 0.57 | 0.33             | 0.06       | -0.01                | -0.05                | 0.06                   | -0.11          | -0.01                 | 0.28                 | 0.29                 | 0.21              | 0.24                  | 0.29       | 0.29                 | 0.23         | 0.37     | 0.76     | 0.31                | 0.42         | 1.00   |  |  |

Supplemental Table 2. Relation between air toxics exposure in pregnancy and retinoblastoma, stratified by laterality

|                                                   | Unilateral cases |                   | Bilateral cases  |                   |
|---------------------------------------------------|------------------|-------------------|------------------|-------------------|
|                                                   | N cases/controls | OR (95% CI)       | N cases/controls | OR (95% CI)       |
| <b>1<sup>st</sup> factor</b>                      |                  |                   |                  |                   |
| Ortho-xylene                                      | 58/22253         | 1.54 (1.08, 2.20) | 23/22247         | 1.20 (0.66, 2.16) |
| Toluene                                           | 82/22364         | 1.47 (1.06, 2.06) | 23/22358         | 1.41 (0.76, 2.62) |
| Ethyl Benzene                                     | 57/21550         | 1.47 (1.10, 1.97) | 22/21544         | 1.21 (0.73, 1.99) |
| 1,3-Butadiene                                     | 64/25141         | 1.43 (0.90, 2.27) | 24/25134         | 2.04 (1.00, 4.17) |
| Benzene                                           | 64/25151         | 1.49 (0.87, 2.57) | 24/25144         | 2.21 (0.95, 5.12) |
| Styrene                                           | 51/18523         | 1.35 (0.98, 1.85) | 18/18517         | 1.07 (0.59, 1.93) |
| Meta/para-xylene                                  | 42/15722         | 1.33 (0.95, 1.87) | 14/15718         | 1.47 (0.84, 2.59) |
| <b>Pollutants that did not load into a factor</b> |                  |                   |                  |                   |
| Chloroform                                        | 62/23612         | 1.37 (1.04, 1.81) | 24/23605         | 1.28 (0.82, 2.00) |
| Para-Dichlorobenzene                              | 53/19556         | 1.33 (1.10, 1.61) | 20/19551         | 0.94 (0.59, 1.50) |
| Formaldehyde                                      | 62/23449         | 1.10 (0.84, 1.45) | 24/23442         | 1.23 (0.85, 1.78) |
| Chromium (total)                                  | 48/18337         | 1.17 (0.88, 1.57) | 14/18331         | 1.54 (1.12, 2.11) |
| Acetaldehyde                                      | 62/23449         | 0.89 (0.60, 1.32) | 24/23442         | 1.32 (0.74, 2.36) |
| Nickel                                            | 48/18357         | 1.36 (0.94, 1.96) | 14/18351         | 1.85 (1.07, 3.20) |

Odds ratios adjust for paternal age, maternal race and birthplace, birth year, and method of payment for prenatal care.
